# Supplementary material
Source: Research Square preprint supplement (doi:10.21203/rs.3.rs-7473418/v1)
Supplement: Supplementary file 1 [file cc3cd9fb04428375dac08999.docx]

Supplementary Table S1 Twenty-eight teleost species were utilized to construct the phylogenetic tree based on orthology single-copy genes

| **No.** | **Order** | **Family** | **Genus** | **Species** | **Accession** |
| --- | --- | --- | --- | --- | --- |
| 1 | Centrarchiformes | - | *Percalates* | *Percalates colonorum* | GCA_040143625.1 |
| 2 | Centrarchiformes | Centrarchidae | *Lepomis* | *Lepomis gibbosus* | GCA_029875015.1 |
| 3 | Centrarchiformes | Centrarchidae | *Lepomis* | *Lepomis macrochirus* | GCA_024633595.2 |
| 4 | Centrarchiformes | Centrarchidae | *Micropterus* | *Micropterus dolomieu* | GCA_021292245.1 |
| 5 | Centrarchiformes | Centrarchidae | *Micropterus* | *Micropterus floridanus* | GCA_002592385.1 |
| 6 | Centrarchiformes | Centrarchidae | *Micropterus* | *Micropterus salmoides* | GCA_014851395.1 |
| 7 | Centrarchiformes | Oplegnathidae | *Oplegnathus* | *Oplegnathus fasciatus* | GCA_003416845.1 |
| 8 | Centrarchiformes | Percichthyidae | *Gadopsis* | *Gadopsis bispinosus* | GCA_036024995.1 |
| 9 | Centrarchiformes | Percichthyidae | *Gadopsis* | *Gadopsis marmoratus* | GCA_036023855.1 |
| 10 | Centrarchiformes | Percichthyidae | *Maccullochella* | *Maccullochella macquariensis* | GCA_036024715.1 |
| 11 | Centrarchiformes | Percichthyidae | *Maccullochella* | *Maccullochella peelii* | GCA_002120245.1 |
| 12 | Centrarchiformes | Percichthyidae | *Maccullochella* | *Maccullochella peelii peelii* | This study |
| 13 | Centrarchiformes | Percichthyidae | *Macquaria* | *Macquaria ambigua* | GCA_008360985.2 |
| 14 | Centrarchiformes | Percichthyidae | *Macquaria* | *Macquaria australasica* | GCA_005408345.1 |
| 15 | Centrarchiformes | Percichthyidae | *Nannoperca* | *Nannoperca australis* | GCA_036023655.1 |
| 16 | Centrarchiformes | Percichthyidae | *Nannoperca* | *Nannoperca obscura* | GCA_036024295.1 |
| 17 | Centrarchiformes | Sinipercidae | *Coreoperca* | *Coreoperca whiteheadi* | GCA_011952105.1 |
| 18 | Centrarchiformes | Sinipercidae | *Siniperca* | *Siniperca chuatsi* | GCA_020085105.1 |
| 19 | Centrarchiformes | Sinipercidae | *Siniperca* | *Siniperca knerii* | GCA_016617885.1 |
| 20 | Centrarchiformes | Sinipercidae | *Siniperca* | *Siniperca obscura* | GCA_029911005.1 |
| 21 | Centrarchiformes | Sinipercidae | *Siniperca* | *Siniperca scherzeri* | GCA_027580175.1 |
| 22 | Centrarchiformes | Sinipercidae | *Siniperca* | *Siniperca undulata* | GCA_029910985.1 |
| 23 | Centrarchiformes | Terapontidae | *Amniataba* | *Amniataba percoides* | GCA_037176925.1 |
| 24 | Centrarchiformes | Terapontidae | *Bidyanus* | *Bidyanus bidyanus* | GCA_036024835.1 |
| 25 | Centrarchiformes | Terapontidae | *Hephaestus* | *Hephaestus fuliginosus* | GCA_037177315.1 |
| 26 | Centrarchiformes | Terapontidae | *Leiopotherapon* | *Leiopotherapon unicolor* | GCA_036025355.1 |
| 27 | Centrarchiformes | Terapontidae | *Scortum* | *Scortum barcoo* | GCA_023238725.1 |
| 28 | Centrarchiformes | Terapontidae | *Terapon* | *Terapon puta* | GCA_028564955.1 |

Supplementary Table S2 Additional 18 species were utilized to construct the phylogenetic tree based on mitochondrial conserved genes.

| **No.** | **Class** | **Order** | **Family** | **Genus** | **Species** | **Data ID** |
| --- | --- | --- | --- | --- | --- | --- |
| 1 | Actinopteri | Centrarchiformes | Percichthyidae | *Gadopsis* | *Gadopsis bispinosus* | NC_024848.1 |
| 2 | Actinopteri | Centrarchiformes | Percichthyidae | *Gadopsis* | *Gadopsis marmoratus* | NC_024436.1 |
| 3 | Actinopteri | Centrarchiformes | Percichthyidae | *Maccullochella* | *Maccullochella ikei* | NC_028166.1 |
| 4 | Actinopteri | Centrarchiformes | Percichthyidae | *Maccullochella* | *Maccullochella macquariensis* | NC_028167.1 |
| 5 | Actinopteri | Centrarchiformes | Percichthyidae | *Maccullochella* | *Maccullochella mariensis* | NC_037076.1 |
| 6 | Actinopteri | Centrarchiformes | Percichthyidae | *Maccullochella* | *Maccullochella peelii* | NC_023807.1 |
| 7 | Actinopteri | Centrarchiformes | Percichthyidae | *Macquaria* | *Macquaria ambigua* | NC_024849.1 |
| 8 | Actinopteri | Centrarchiformes | Percichthyidae | *Macquaria* | *Macquaria australasica* | NC_023383.1 |
| 9 | Actinopteri | Centrarchiformes | - | *Percalates* | *Percalates novemaculeata* | NC_024850.1 |
| 10 | Actinopteri | Centrarchiformes | - | *Percalates* | *Percalates colonorum* | NC_087904.1 |
| 11 | Actinopteri | Centrarchiformes | Oplegnathidae | *Oplegnathus* | *Oplegnathus punctatus* | NC_013143.1 |
| 12 | Actinopteri | Centrarchiformes | Oplegnathidae | *Oplegnathus* | *Oplegnathus fasciatus* | NC_010968.1 |
| 13 | Actinopteri | Centrarchiformes | Terapontidae | *Bidyanus* | *Bidyanus bidyanus* | NC_024854.1 |
| 14 | Actinopteri | Centrarchiformes | Terapontidae | *Leiopotherapon* | *Leiopotherapon unicolor* | NC_043855.1 |
| 15 | Actinopteri | Centrarchiformes | Terapontidae | *Rhynchopelates* | *Rhynchopelates oxyrhynchus* | NC_013141.1 |
| 16 | Actinopteri | Centrarchiformes | Terapontidae | *Scortum* | *Scortum barcoo* | NC_027171.1 |
| 17 | Actinopteri | Centrarchiformes | Terapontidae | Terapon | Terapon jarbua | NC_027281.1 |
| 18 | Actinopteri | Centrarchiformes | Terapontidae | Terapon | Terapon theraps | NC_056114.1 |
